# Supplementary material for: Hemojuvelin Predicts Acute Kidney Injury and Poor Outcomes Following Cardiac Surgery
Source: PubMed Central journal article supplement (PMC5792584; doi:10.1038/s41598-018-20212-8), 2018-01-31
Supplement: 41598_2018_20212_MOESM1_ESM.pdf [file 41598_2018_20212_MOESM1_ESM.pdf]

Supplementary file

## **Hemojuvelin Predicts Acute Kidney Injury and Poor Outcomes Following Cardiac Surgery**

Sheng-Wen Ko, Nai-Hsin Chi, Che-Hsiung Wu, Tao-Min Huang, Shih-Chieh Jeff

Chueh, Chih-Hsien Wang, Jui-Hsiang Lin, Wei-Jie Wang, Jui-Tsung Ting,

Huang-Ming Chang, Rory Connolly, Chien-Heng Lai, Li-Jung Tseng, Vin-Cent Wu,

Tzong-Shinn Chu

Correspondence and reprint requests to:

*Vin-Cent Wu, MD, PhD;*

Department of Medicine, National Taiwan University Hospital,

7 Chung-Shan South Road, Zhong-Zheng District, Taipei 100, Taiwan,

Email: [q91421028@ntu.edu.tw](mailto:q91421028@ntu.edu.tw)

Phone: +886 2 23123456 × 63098, and fax: +886 2 23952333.

Supplementary File 1

Table S1: The Cleveland Clinic Foundation Acute Renal Failure Scoring System

| Risk Factor                                                   | Points |
|---------------------------------------------------------------|--------|
| Female gender                                                 | 1      |
| Congestive heart failure                                      | 1      |
| Left ventricular ejection fraction < 35%                      | 1      |
| Chronic obstructive pulmonary disease                         | 1      |
| Insulin-requiring diabetes                                    | 1      |
| Previous cardiac surgery                                      | 1      |
| Preoperative use of IABP                                      | 2      |
| Emergency surgery                                             | 2      |
| Valve surgery only (reference to CABG)                        | 1      |
| CABG plus valve (reference to CABG)                           | 2      |
| Other cardiac surgeries                                       | 2      |
| Preoperative creatinine 1.2 to < 2.1 mg/dl (reference to 1.2) | 2      |
| Preoperative creatinine $\geq$ 2.1 mg/dl (reference to 1.2)   | 5      |

Abbreviation: CABG, Coronary artery bypass grafting; IABP, Intra-aortic balloon pump.

Table S2:

| AKI               | T3                     | T6                     |
|-------------------|------------------------|------------------------|
| adjusted HJV      | 0.671<br>(0.568~0.774) | 0.693<br>(0.592~0.794) |
| Cr                | 0.698<br>(0.607~0.779) | 0.772<br>(0.686~0.844) |
| ROC comparison    | p = 0.7149             | p = 0.2628             |
| Advanced AKI      | T3                     | T6                     |
| adjusted HJV      | 0.833<br>(0.718~0.947) | 0.808<br>(0.683~0.932) |
| Cr                | 0.675<br>(0.583~0.758) | 0.622<br>(0.529~0.709) |
| ROC comparison    | p = 0.0775             | p = 0.0777             |
| Composite outcome | T3                     | T6                     |
| adjusted HJV      | 0.867<br>(0.780~0.955) | 0.857<br>(0.760~0.955) |
| Cr                | 0.637<br>(0.544~0.723) | 0.623<br>(0.529~0.710) |
| ROC comparison    | p = 0.0025             | p = 0.0047             |

Figure S1:

Receiver-operator characteristic curves for urinary creatinine-adjusted HJV and serum creatinine at 3 and 6 hours post-surgery.

(A)

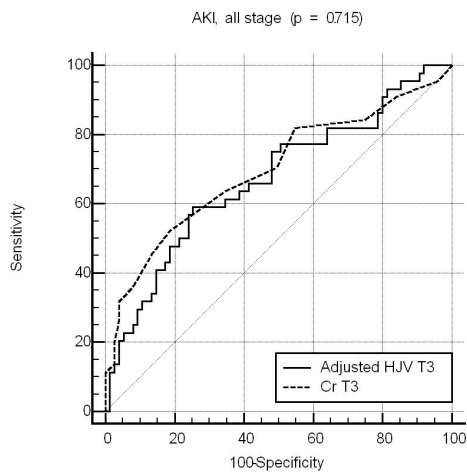

(B)

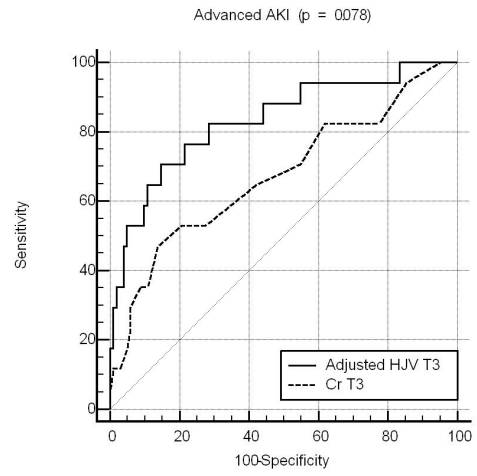

(C)

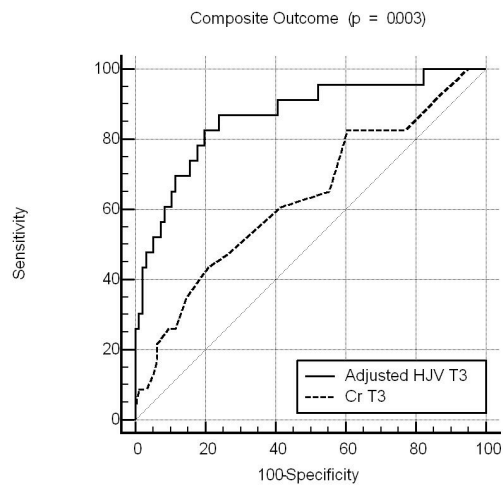

(D)

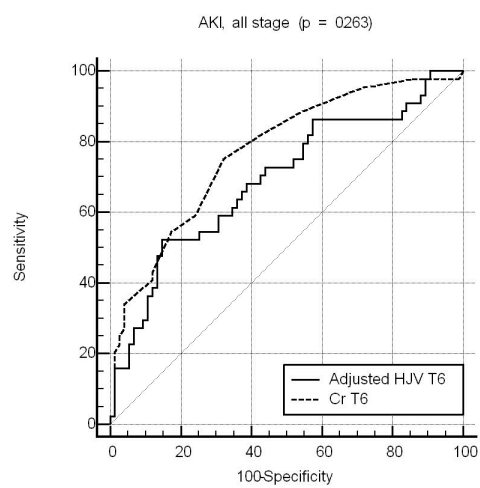

(E)

(F)

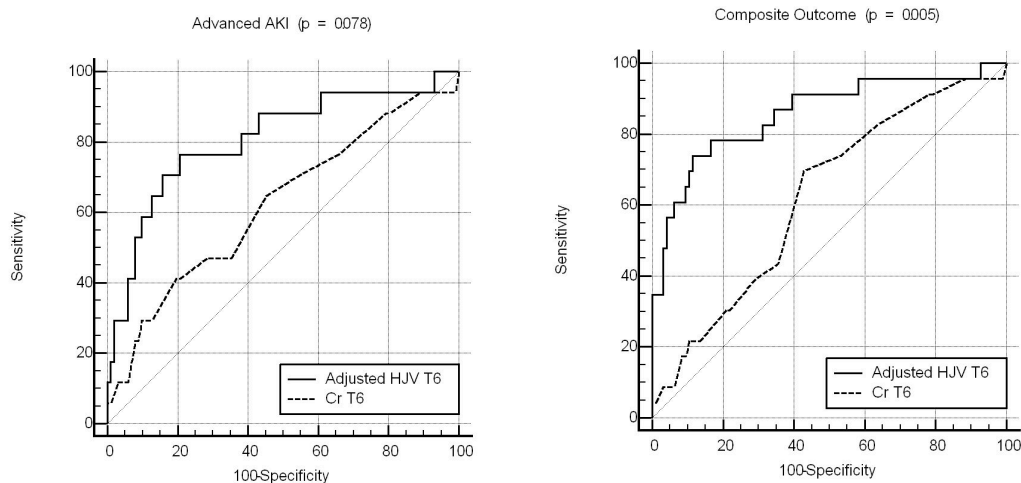

(A) predicting AKI (all stages), (B) predicting advanced AKI, and (C) predicting composite outcome at 3 hours.

(D) predicting AKI (all stages), (E) predicting advanced AKI, and (F) predicting composite outcome at 6 hours.

Result:

We have shown a comparison of the area under the receiver-operating characteristic curves between serum creatinine and urinary HJV at 3 and 6 hours. With respect to composite outcome, the performance of urinary creatinine-adjusted HJV was better than serum creatinine alone.

References:

Thakar, C. V., Arrigain, S., Worley, S., Yared, J. P. & Paganini, E. P. A clinical score to predict acute renal failure after cardiac surgery. *J Am Soc Nephrol* **16**, 162-168, doi:10.1681/ASN.2004040331 (2005).

## Supplementary File 2

### ***Validaiton of the recombinant protein standard from ELISA (USCN LIFE SCIENCE, INC)***

#### **Materials and methods**

LC-MS/MS analysis performed by TOOLS BIOTECH, INC. Briefly, the digested HJV recombinant protein, which was kindly provided by USCN LIFE SCIENCE, INC was analyzed by LC-MS/MS using a Dionex Ultimate 3000 RSLCnano system. This analysis was coupled with a Hybrid mass spectrometer (Thermo Orbitrap Elite). The data analysis was carried out using Proteome Discoverer software (version 1.4, Thermo Fisher Scientific). The MS/MS spectra were searched against the SwissProt database (released on Mar 16, 2016, extracted for Homo sapiens, 20,199 sequences) using the Mascot search engine (Matrix Science, London, UK; version 2.5).

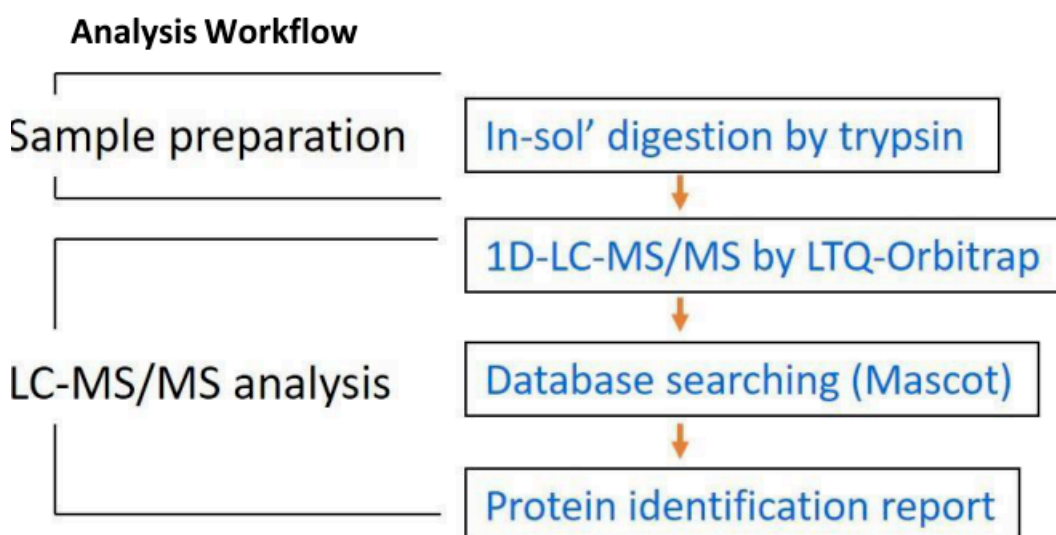

#### **Results**

This protein identification result showed 65.74% of the relative protein abundance is human hemojuvelin. This result supports that the protein indentification of our samples should be HJV.

## Summary of search results

We have successfully identified the target protein Hemojuvelin with 6 unique peptides in C-terminal region of protein. The detail search result was showed in Data Report.

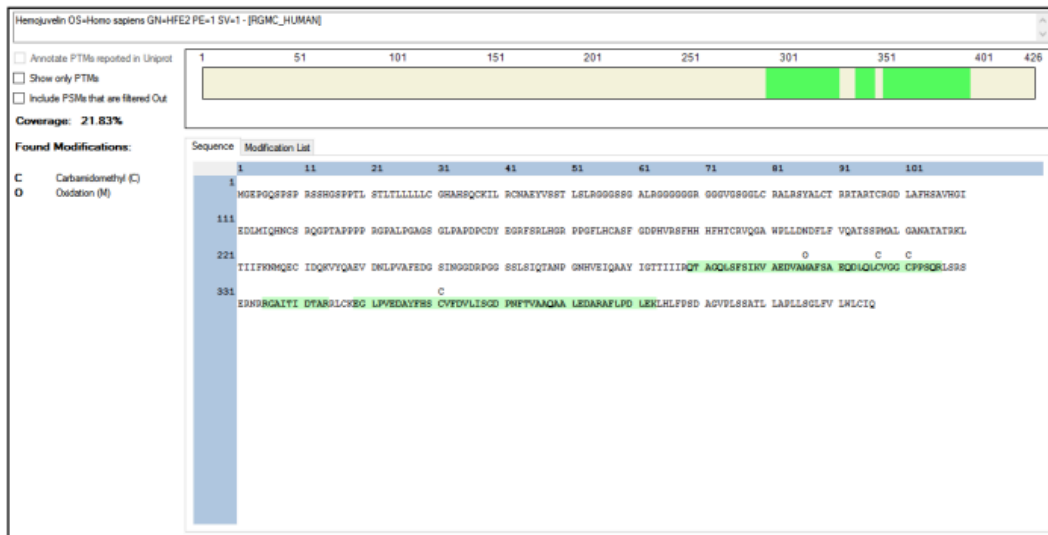

| Sample     | Accession | Identity    | Species             | # Unique peptides | Score   | # AAs | MW (kDa) | Sequence coverage |
|------------|-----------|-------------|---------------------|-------------------|---------|-------|----------|-------------------|
| RGMc_Human | Q6ZVN8    | Hemojuvelin | <i>Homo sapiens</i> | 6                 | 2014.33 | 426   | 45.1     | 21.83%            |

Denoted : Hemojuvelin = Homo sapiens GN = RGMC\_HUMAN
